# Supplementary material
Source: publisher site journal article supplement (https://www.dovepress.com/article/423209)
Supplement: Supplementary file 1 [file get_supplementary_file.php]

Appendices 1-8 are reproduced from International Council of Cardiovascular Prevention and Rehabilitation (ICCPR). Copyright 2010. Available from https://globalcardiacrehab.com/Program-Certification. Accessed October 31, 2023.

Appendix 1


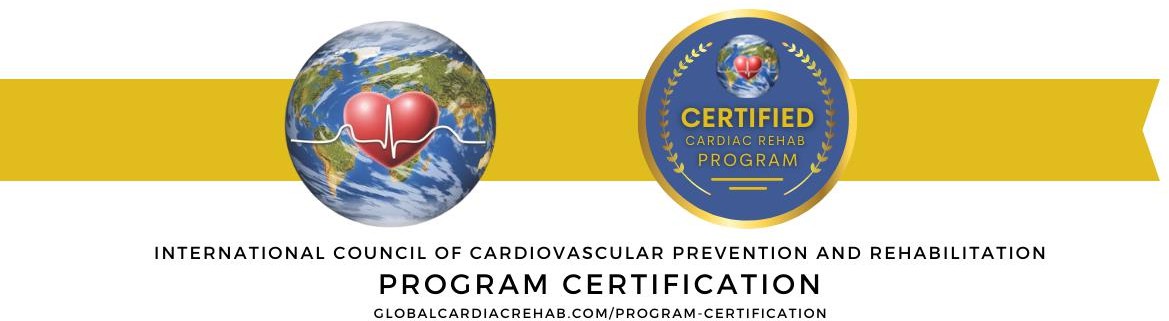


**ICCPR Program Certification Applicant Assessment Form**

**SITE APPLICATION INFORMATION**

### [To be completed by the ICCPR Program Certification Secretary]

Date application received: Click or tap to enter a date.

Application # Click or tap here to enter text.(last digits year) Click or tap here to enter text. (consecutive numbering)

Site name: Click or tap here to enter text.

Site country: Click or tap here to enter text.☐ High-income ☐ middle ☐ low

Preferred assessment language: ☐English ☐other (please specify:Click or tap here to enter text.) Funding source: ☐ private ☐ certain public ☐ uncertain public

1

**SITE ELIGIBILITY**

### [To be completed by the ICCPR Program Certification Secretary w Consultation with Cttee Co-Chairs as Needed]

**The following requirements need to be met to qualify for program certification**

Linkage to ICCPR? ☐ Yes ☐ in process (describe: Click or tap here to enter text.) ☐ no (inform co- chairs)

CRFC certificate received? ☐ Yes ☐ No

All needed materials received? ☐ Yes ☐ No (specify what outstanding: Click or tap here to enter text.)

Applicable application fee received? ☐ Yes ☐ No (inform applicant, and do not inform co-chairs until received)

### If above met, the following needs to be checked before commencing assessment of site data

Any data issues?

- no data quality or completeness issues ☐ outstanding issues Number of patients with any post-program / progress data: ☐(must be ≥ 60)

Months where post-program / progress data have been entered: Click or tap here to enter text.(must be

≥ 4)

2

**Assessment of Quality Standards using ICRR Data**

### [To be completed by the ICCPR Program Certification Secretary w Consultation with Co-Chair and Site Assessor]

**If above met, the ICCR data can be used to initially determine whether programs meet the following quality standards (fill in pre-site visit / audit column and Assoc. comments):**

|  | Quality Standard | Met pre-site  visit? | Comments | Met during  site visit? | Comments |
| --- | --- | --- | --- | --- | --- |
| 1* | Comprehensive | - yes - no |  | - yes - no |  |
| 2 | Multidisciplinary team | - yes - no |  | - yes - no |  |
| 3* | Cardiac emergencies policy | - yes - no |  | - yes - no |  |
| 4 | Assmt tobacco | - yes - no |  | - yes - no |  |
| 5 | Assmt BP | - yes - no |  | - yes - no |  |
| 6 | Program completion rate | - yes - no |  | n/a |  |
| 7* | Peak METs increase | - yes - no |  | n/a |  |
| 8 | QoL increase | - yes - no |  | n/a |  |
| 9 | Mins MVPA ≥150/wk post | - yes - no |  | n/a |  |
| 10 | Knowledge – meds | - yes - no |  | - yes - no |  |
| 11 | Knowledge – lipids | - yes - no |  | - yes - no |  |
| 12 | Knowledge – diet | - yes - no |  | - yes - no |  |
| 13 | Knowledge- return to life roles | - yes - no |  | - yes - no |  |
| Total |  | 70%?   - yes - no |  | 70%?   - yes - no |  |

3

*mandatory met? ☐ Yes ☐ No

MANDATORY MET & 70% (9/13) STDS PRE-SITE VISIT? ☐ yes (proceed to secure site assessor)

- no (communicate to site; they have 2 weeks to provide documentation for re-consideration they are met)

Date communicated to site: Click or tap to enter a date.

Comments re: response, if applicable (secretary to save all correspondence): Click or tap here to enter text.

4

**VIRTUAL SITE ASSESSMENT TO CONFIRM QUALITY**

### Prior to Site Visit / Audit

**[To be completed by the ICCPR Program Certification Secretary w Consultation with co-chair and site assessor]**

Primary site assessor secured (first name, last name): Click or tap here to enter text. Site assessor trainee (if applicable): Click or tap here to enter text.

Confirm no conflicts of interest? ☐ yes ☐ no

Confirm site assessor(s) training complete? ☐ yes ☐ no Date of site visit: Click or tap to enter a date.

Date of technical rehearsal w Secretary: Click or tap to enter a date. Any issues at technical rehearsal: Click or tap here to enter text.

Secretary present for site visit? ☐ yes ☐ no (why not?Click or tap here to enter text.) 5 random site patient IDs with some post data to be tested during site visit:

### Virtual Site Visit / Audit

SITE ASSESSOR AND SECRETARY COMPLETE 2 FAR RIGHT COLUMNS IN ABOVE TABLE

Site visit completed successfully? ☐ yes ☐ no (please specify:Click or tap here to enter text.)

Any additional comments regarding site visit (save correspondence): Click or tap here to enter text.

Need for additional information from site before making decision? ☐ no ☐ yes (please specify: Click or tap here to enter text.)

If applicable: received? ☐ yes ☐ no

Need for 2nd site visit? ☐ no ☐yes (specify reason and what needs to be confirmed: Click or tap here to enter text.)

If applicable: Date of 2nd site visit: Click or tap to enter a date.

5

**CERTIFICATION DECISION & COMMUNICATION**

### [To be decided Site Assessor after site visit, with Secretary. Can solicit input from ICCPR Certification Committee if required]

Site meet all requirements for certification? (select one of the following 5 options)

- yes
- no
- potential with remediation (please specify: Click or tap here to enter text.)
- could not be determined (please specify: need to observe pt)
- more information needed prior to decision (please specify: Click or tap here to enter text.)

Co-chair review and finalize certification decision: ☐ concur ☐ request for further information ☐

dissent

### Certification Decision Communication with Site

Site informed of decision: Click or tap to enter a date.

*If met*: Site provided certificate and marketing materials? ☐ yes ☐ no

*If met*: site added to ICCPR website and announced on social media? ☐ yes ☐ no

*If met*: any issues during 3-year certification term with quality maintenance? ☐ no ☐ yes (please specify: Click or tap here to enter text.)

*If met*: end date for certification (end of 3rd calendar year): Dec 31, 20Click or tap here to enter text. (to trigger re-certification process)

*If not met*: program re-butt decision or provide contextual information that would lead us to change decision? ☐ no ☐ yes (date: Click or tap to enter a date.)

Rationale / materials received: Click or tap here to enter text. Outcome: ☐ certified ☐ not certified

*If not met*: program request re-attempt? ☐ no ☐ yes (date): Click or tap to enter a date.

Re-attempt fee paid? ☐ yes ☐ no

Quality standards they will attempt to satisfy: #Click or tap here to enter text.; # Click or tap here to enter text.

Site visit required? ☐ yes ☐ no

6

Needed documentation received: ☐ yes ☐ no

**3-YEAR RE-CERTIFICATION**

Outcome based on communication of site assessor and co-chair: ☐ certified ☐ not certified

7


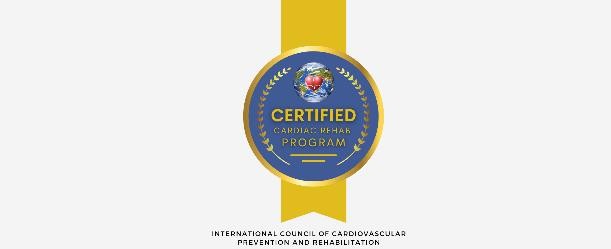


Appendix 2

### ICCPR Program Certification

Virtual Site Assessor Training SOP (for Secretary)

V1; February 14, 2022

1. When Secretary receives correspondence from new committee member (in future, reach out proactively via email when new members start terms using template email below) / interested site assessor, start a new row for them in the site assessor “training and roster” excel (dropbox “site assessors” subfolder)
   1. Ensure candidate currently or previously served on ICRR Steering or sub-committees or ICCPR committee (see excel files or website, or ask ICCPR secretary for confirmation), and meets the criteria of a site assessor (e.g., as per Steering Co Terms of Reference)
      1. If unsure check with steer co co-chairs
   2. complete all relevant columns (you may need info from member excel file in applicable governance subfolder of that committee)
2. Ensure ICCPR conflict of interest (CoI) & confidentiality form complete
   1. Save to dropbox “mtgs & governance” subfolder or “site assessor” subfolder with the forms,
   2. If not completed, ask the party to complete fully, and save in “site assessor” subfolder for completed forms in dropbox
   3. if any conflicts declared, alert co-chair and copy to “comments” column of the excel
3. Via email using the template below (scroll down), direct site assessor to review policies and procedures at [https://globalcardiacrehab.com/Program-Certification,](https://globalcardiacrehab.com/Program-Certification) but provide them with Word version containing comments with the variables listed for each quality standard, and provide them the Assessment Application form template (dropbox).
4. Arrange for site assessor to observe a site assessment (if has, document date in excel)
   1. Check applicant tracking excel for dates of upcoming virtual site assessments. Let the potential assessors know of dates and confirm which one they can attend
   2. ensure candidate has no conflicts with the site to be assessed, and is not from country of site to be assessed.
      1. Document observation complete in the “training and roster” excel
   3. If there is no upcoming virtual site assessment and this training element needs to be met before an upcoming site assessment that we would like this assessor to lead for reasons of language for example, watching the recording of the site assessment will be sufficient; just notate that recording was observed in the training roster excel

1

1. Arrange 45-minute video call, and copy list of below things on which they will be quizzed so they prepare accordingly (this can be done before or after site assessment observation, but if after we recommend the site assessor watch the recording of a site assessment first)
   1. Once time is agreed, as per secretary SOP, send a calendar invite with time zone checked and link in the location
      1. If secretary will not be on the call, get the desired link from the program certification committee member leading the training
   2. During video call with their camera on (so you can check they have good quality connection and communicate clearly), question them on:
      1. What is the purpose of ICCPR’s program certification
      2. Describe some of the program-level standards, and how they are assessed
      3. Describe some of the patient-level standards, and how they are assessed
      4. Describe site requirements to qualify for a program certification site visit
      5. Describe what you would do to prepare for a site visit and how you would start the site visit
      6. Walk us through the 6 aspects you will be assessing during the visit
      7. How / what will you document from the site visit findings on the Assessment Application form section for the site visit (please share the file on your screen)
      8. What would you say and do if the site is not prepared to show one of the elements required
      9. Would you tell a site if they are meeting each standard or not? why or why not? And what would you do if the site asks whether they will be certified or not?
      10. What would you say at the end of the site visit to the site
      11. What would you do after the visit? How would you handle if it was unclear if a quality standard was met or not?
   3. Clarify any areas where potential assessor doesn’t have understanding
   4. Add any comments about the responses in the excel “comments” column
2. If you are concerned about the understanding of the site assessor or any other reason the candidate may not be a good assessor (e.g., sound, communication in English, video quality, respect of sites), confer with ICCPR Prog Cert co-chair via email to decide on remediation plan, or other
   1. When complete and if satisfactory, complete all remaining columns in “training and roster” excel in “site assessor” dropbox subfolder of “program certification” (ie. If no concerns, enter date assessor is approved to complete site assessments)

***TWO TEMPLATE EMAILS:***

*TEMPLATE EMAIL TO ICCPR / ICRR COMMITTEE MEMBERS TO SOLICIT COI FORMS:*

RE: Please complete ICCPR Program Certification CoI and Declaration form to initiate site assessor training process

Dear Member of the ICCPR / ICRR Community:

2

As part of your service, we ask that you volunteer to undertake ICCPR Program Certification virtual site assessments with the Secretary upon reasonable request. Kindly complete the attached conflict and declaration form and attach it in reply email.

We will then be in touch to arrange training accordingly. Sincerely,

ICCPR Program Certification co-chair and Secretary

*TEMPLATE EMAIL TO POTENTIAL SITE ASSESSORS TO MAKE ARRANGEMENTS:*

RE: Arranging training for ICCPR program certification virtual site assessments

Dear Member of the ICCPR / ICRR Community:

Thank you for declaring your capacity and willingness to serve as a Program Certification site assessor. We have received your completed materials, and all is in order.

Please carefully review the policies and procedures at [https://globalcardiacrehab.com/Program-](https://globalcardiacrehab.com/Program-Certification) [Certification](https://globalcardiacrehab.com/Program-Certification) (see in particular the CR quality standards and virtual site visit assessment procedures section). FYI, I have also attached a file outlining the site visit process. I have also attached the Applicant Assessment form, which we use for each site visit to facilitate site assessment in accordance with these policies and procedures (the Secretary completes this, and would document your quality standard ratings there after any site visit). If you are interested, you can see the ICRR variables on which program quality pre-assessment is based here [https://globalcardiacrehab.com/ICRR-Variables-&-Data-Dictionary](https://globalcardiacrehab.com/ICRR-Variables-%26-Data-Dictionary). Please let us know if you have any questions.

To complete your training, you need to observe an assessment, and have a 45-minute call with us.

1. The following are dates of upcoming virtual site assessments: xxxxx. Please let us know if any of these dates suit.
   1. There is also a recording of a site assessment available here we suggest you watch: [https://www.dropbox.com/s/bkbui0cm78czgmj/ICCPR_Prog%20Cert_virtual%20site](https://www.dropbox.com/s/bkbui0cm78czgmj/ICCPR_Prog%20Cert_virtual%20site%20assmt_recording4training_22.mp4?dl=0)

[%20assmt_recording4training_22.mp4?dl=0](https://www.dropbox.com/s/bkbui0cm78czgmj/ICCPR_Prog%20Cert_virtual%20site%20assmt_recording4training_22.mp4?dl=0).

1. We also need to arrange a mutually-convenient time for a video call with your camera on (to ensure good connection and 2-way communication) where you will be asked the following:
2. What is the purpose of ICCPR’s program certification
3. Describe some of the program-level standards, and how they are assessed
4. Describe some of the patient-level standards, and how they are assessed
5. Describe site requirements to qualify for a program certification site visit
6. Describe what you would do to prepare for a site visit and how you would start the site visit
7. Walk us through the 6 aspects you will be assessing during the visit
8. How / what will you document from the site visit findings on the Assessment Application form section for the site visit with they support of the Secretary (please share the file on your screen)

3

1. What would you say and do if the site is not prepared to show one of the elements required
2. Would you tell a site if they are meeting each standard or not? why or why not? And what would you do if the site asks whether they will be certified or not?
3. What would you say at the end of the site visit to the site
4. What would you do after the visit? How would you handle if it was unclear if a quality standard was met or not?
   1. We recommend that if there is not an opportunity to view a virtual site assessment before this session, you watch the recording to help you prepare
   2. Here are some potential times; please let us know what works for you:

Sincerely,

ICCPR Program Certification co-chair and Secretary

4


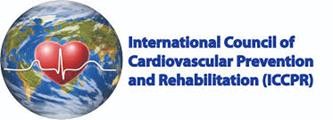

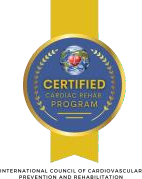


Appendix 3

### ICCPR Program Certification

Conflict of Interest Disclosure

ICCPR’s program certification scheme is to recognize cardiac rehabilitation (CR) programs in low- resource settings (includes in high-income countries) who meet a minimum quality standard with regard to program structure, processes and patient outcomes.

### Given Name (First Name): Surname (Last name):

Thinking about relationships with any third party (e.g., industry, private foundation), financial or otherwise, or with members of ICCPR or ICRR governance committees (shown on our website):

Do you have any relevant or potential conflicts of interest related to your service on ICCPR’s Program Certification Steering Committee?

### No

- **Yes**

If Yes, please specify:

Confidentiality & Integrity Declaration (for virtual site assessments)

If I am invited and accept to serve as an ICCPR Program Certification virtual site assessor, I shall maintain the confidentiality of the program(s) I assess, as well as the findings from the assessment in perpetuity. I shall undertake the virtual site assessment duties with integrity, while upholding the mission of the ICCPR.

If I have any potential conflicts of interest with any site for which I am asked to serve as a virtual site assessor at any time, I shall disclose this to the Program Certification Secretary and recuse myself from serving.

- **No**
- **Yes**

**I can undertake site assessments in the following languages:**

**Date:** DD/MMM/ YYYY

### Signature:


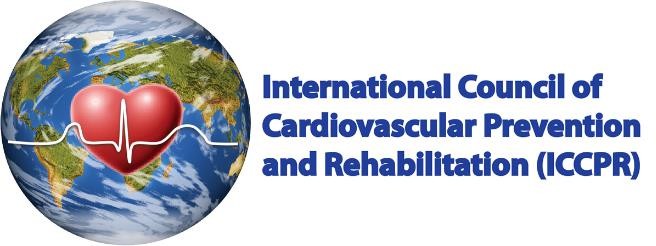


Appendix 4

ICCPR Program Certification

Email Template #1

to applicant programs upon processing of initial application materials (select appropriate template).

## IF PROGRAM DID NOT PROVIDE ALL NEEDED INFORMATION

RE: ICCPR Program Certification Application- [COUNTRY] – needed materials Dear Program:

Thank you for your interest in becoming an ICCPR-certified program. We are delighted to work with you to consider your program and associated materials.

At this point, unfortunately, we are not able to proceed with consideration of your program, for the following reason(s):

- We have not received your application fee
- We received the wrong amount for application, and $) is outstanding
- We have not received a Cardiac Rehab Foundations Certificate for a member of your program
- The ICRR has raised some issues around the quality of your contributed data, which need to be rectified before we could proceed in considering your program for certification
- You have not contributed at least 60 patients to the registry
- You have not yet provided the minimum of 4 months of post-program data to the registry
- We have not received 2 CR team member job descriptions of different disciplines who will be available to attend the virtual site visit, including documentation they belong to their profession regulatory body in good standing. If this is not possible, then please provide evidence of their highest educational qualification.

Our Program Certification chair has recommended the following as a means to formally engage the CR community in your country / region with the ICCPR community:

Kindly provide the necessary materials or a response within 2 weeks, and we would be happy to review them and potentially move forward in the certification consideration process. If you have

any questions, consult our policies and procedures ([https://globalcardiacrehab.com/Program-](https://globalcardiacrehab.com/Program-Certification) [Certification](https://globalcardiacrehab.com/Program-Certification)), or ask.

Sincerely,

ICCPR Program Certification Secretary

## IF PROGRAM DOES NOT MEET REQUIREMENTS TO BE CONSIDERED FOR CERTIFICATION

RE: ICCPR Program Certification Application- [COUNTRY] – meeting standards Dear Program:

Thank you for your interest in becoming an ICCPR-certified program.

At this point, unfortunately, we are not able to proceed with consideration of your program, for the following reason(s):

- You do not meet 1 of the 3 mandatory quality standards
  - Comprehensive program
  - Cardiac emergency policy
  - Mean peak MET increase in completers from pre to post-program of ≥.5
- Based on program survey responses and/or patient data in the registry, you do not come close to meeting at least 70% of the 13 quality standards, as shown in the Table below (see <https://globalcardiacrehab.com/Program-Certification> for details on each standard)

| **Item** | **Quality Standard** | **Description** | **Data source** | **Met?** |
| --- | --- | --- | --- | --- |
| *Program-level / Structure & Process Indicators* | | | | |
| 1* | Comprehensive | *Comprehensive program, including (a) initial assessment, (b) structured exercise training (supervised or unsupervised) and  (c) ≥1 other strategy to control CVD risk factors; evidenced based on program survey and during site visit (demonstration of at least one other component) | Program survey | - yes - no |
| 2 | Multidisciplinary team | Multidisciplinary team (i.e., ≥2 different regulated professions available to support patients at least on a part-time or referral basis) | Program survey, provision of current job descriptions with regulatory body membership  (or equivalent) | - yes - no |
| 3* | Cardiac emergencies policy | *Cardiac emergency policies in place | Program survey | - yes - no |

| 4 | Assessment of tobacco | Tobacco use is assessed | Program survey, responses in ICRR | - yes - no |
| --- | --- | --- | --- | --- |
| 5 | Assessment of BP | Blood pressure is assessed | Program survey, responses in ICRR | - yes - no |
| *Patient-level / Process & Outcome Indicators* | | | | |
| 6 | Program completion rate | Program completion rate: <50% of patients lost to follow-up / dropped out for non- clinical reasons other than return-to-work | ICRR data | - yes - no |
| 7* | Peak METs  increase | Mean peak METs increase of ≥.5 from pre to  post-program, in program completers | ICRR data | - yes - no |
| 8 | QoL increase | Mean post-program quality of life score > pre-program score, in program completers | ICRR data | - yes - no |
| 9 | Mins MVPA  ≥150/wk post | Mean minutes of moderate to vigorous- intensity activity per week post-program  /progress ≥150, in program completers | ICRR data | - yes - no |
| 10 | Knowledge – meds | ≥70% of patients reporting yes they know what heart pills they should be taking post- program, in program completers that have coverage for medication | ICRR data | - yes - no |
| 11 | Knowledge – lipids | ≥70% of patients reporting yes they know  their cholesterol level and how to control it post-program, in program completers | ICRR data | - yes - no |
| 12 | Knowledge – diet | ≥70% of patients reporting yes they know how to follow a heart-healthy diet post-  program, in program completers | ICRR data | - yes - no |
| 13 | Knowledge- return to life roles | ≥70% of patients reporting yes they have been supported to get back to their important life roles post-program, in  program completers | ICRR data | - yes - no |
| Total | Total yes: More than 70% (9 questions): □ yes □ no  Mandatory* questions met: □ yes □ no | | | |

We are happy to answer any questions you may have about which variables were used to calculate any of these standards. If you perceive we have made an error or oversight, kindly provide supporting materials or a response within 2 weeks. We would be happy to review them and potentially move forward in the certification consideration process.

If you have any questions, consult our policies and procedures (<https://globalcardiacrehab.com/Program-Certification>), or ask.

Sincerely,

ICCPR Program Certification Secretary

## IF/WHEN PROGRAM READY TO PROCEED TO VIRTUAL SITE VISIT

RE: ICCPR Program Certification Application- [COUNTRY] – proceeding to site visit Dear Program:

Thank you for your interest in becoming an ICCPR-certified program. Based on our review of your submitted materials, program survey responses and registry data (information on our analysis findings can be provided upon request), we are delighted to confirm you meet all the requirements to proceed to virtual site assessment.

The 2-hour virtual site assessment of your phase II program only will be held in English. Your site assessor, whom we have confirmed has no conflicts of interest is:

(cc’ed). Given your time zone and business hours there (as patients and staff must be present at the centre during the assessment), that of myself and the assessor, the best time of day for the site visit is: : in your time zone.

Please confirm which of the following dates you, and other required parties as per the Program Certification policies and procedures, could be available:

Month, days…..

If these times cannot be accommodated, please inform us of your constraints, and we will work to find a mutually-convenient time.

Once you have confirmed the time, we shall send a confirmation calendar appointment with the zoom link.

The 6 elements to be assessed during the site visit can be found here: <https://globalcardiacrehab.com/Program-Certification> (scroll down to "virtual site visit assessment procedures and see table below). Be prepared to answer questions about the 6 elements.

| **Assess- ment** | **Quality Standard/s** | **Evidenced by:** |
| --- | --- | --- |
| 1 | - Comprehensive (1) - Assessment of tobacco (4) - Assessment of BP (5) | Show chart of randomly selected patient(s) from registry (site assessor to state registry IDs during site visit, and confirm correct patient chart pulled based on sex, age and initial assessment date), stored securely, documenting:   1. Initial assessment (e.g., history, risk) 2. the risk factors of tobacco use and blood pressure 3. exercise prescription |
| 2 | - Comprehensive (1) | Show how other components of your CR program are offered (in addition to exercise at least 1 must be offered of the following: patient education [e.g., show materials], risk factor modification [e.g., show charting of cardiac medications], behavior change counselling [e.g., show charting of diet |

|  |  | recommendations, tobacco cessation intervention] or stress management / psychosocial [e.g., show relaxation techniques recommended to patients]) |
| --- | --- | --- |
| 3 | - Multidisciplinary team (2) | Introduce us to 2 members of the team of different disciplines (can include applicant; corresponding to role descriptions provided at time of application), who will describe their clinical roles in the program (if the  other person cannot be available, the site visit will need to be rescheduled upon payment of the re-attempt fee). |
| 4 | - Cardiac emergencies policy (3) | Show the policy / procedure binder / manual for handling cardiac emergencies, and summarize to Assessor (note: staff may be queried on scenarios); Show the means on-site to summon assistance in case of emergency to start life support (latter not applicable to fully remote  programs), including equipment. |
| 5 | - Peak METs increase (7) | Show a patient functional capacity test, or if not possible, where / how performed at your program (can be virtual with patient with consent) |
| 6 | - Knowledge of meds (10), lipids (11), diet (12), return   to life roles (13) | Show a patient education session (could be 1-1, virtual and/or group), and/or secure consent from a patient to speak with the site Assessor about  their education received (e.g., about medications, lipids, diet, psychosocial). |

Please be advised that if all requirements from the policy and procedures are not met in the site visit or it does not start on time, the visit shall be terminated and the re-attempt fee shall apply. For instance:

- - You will need high-speed, wireless internet at your centre. Your device requires a functioning video camera (external USB web cam or integrated), and should be fully charged at the time of the site visit. Do not use a mobile phone.
  - You and the team members will need to be in a fairly quiet space throughout the duration of the virtual site visit. Ensure good sound though the microphone and speaker.
  - Ensure facilities and services can be observed (e.g., laptop on wheels to go to exercise machines, defibrillators as applicable).
  - Ensure you can share documents on your screen in zoom.
  - Ensure you are ready to show **ALL** required aspects of your program as per the elements above:
    1. randomly selected patient charts: be sure to have your file matching registry ID and name handy as we will provide some registry IDs and ask to view those patient charts (e.g., share screen)
       1. we will confirm it is the right patient by cross-referencing the year of birth, sex and initial assessment date for the patient.
       2. if your charts are paper and/or not in English, this might be difficult to show us so try to think ahead how that could be achieved. But if electronic, show on shared screen
       3. If your charts are not in English, please inform us as we will see about having someone on the call with that language proficiency.
    2. Introduce us to other professionals on your team (as per role descriptions sent at time of application) and we will ask them some questions. A minimum of 2 different disciplines must be present, but we prefer if as many members of your

team can be present as possible. All staff should be on-site during the assessment.

- - 1. Show functional capacity testing and patient education (could include written materials) with the tablet on laptop on wheels
    2. Ensure at least 1 patient is available for us to question. The patient should be at the centre for a usual visit, but be willing to stay an extra 15 minutes and be willing to speak with us. Hopefully the patient can have some English-languge proficiency, but please remind us of their most common first languages so we can see if a site assessor with that expertise can be available if not.

A technical rehearsal will be arranged with the Secretary before the actual site assessment. As per the above requirements, at this time, we will confirm you are ready to proceed to the virtual site visit by observing you have the following capability: (1) good internet connection, visuals and sound for you, (2 a and b) able to communicate with (i.e., see and hear) a team member and patient (see point about language above); (3) show us you can share your screen with charts and /or patient education materials; (4) capability to take us on a tour of your centre to show us the various aspects; and (5) we will give you a random patient registry ID# and ask you to pull their chart, show it, and verify some of their information. This will then ensure you are ready to proceed to the actual site visit. The site visit will not proceed until this is met.

If you have any questions, consult our policies and procedures (<https://globalcardiacrehab.com/Program-Certification>), or ask.

Sincerely,

ICCPR Program Certification Secretary

Appendix 5


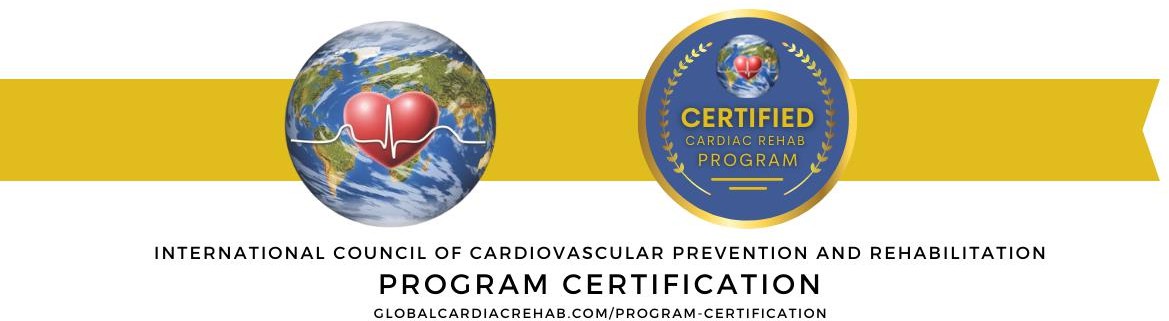


**Procedures for Virtual Site Assessments – Information to Support Site Assessors**

## TRAINING

The standards and policies are found here: <https://globalcardiacrehab.com/Program-Certification>

You will observe another virtual site assessment, and meet with the ICCPR Program Certification Exec to ensure you are prepared and answer any questions you may have. During this meeting we will also ensure you have a good internet connection, and good sound and video quality. Be sure you do not connect via a smartphone.

## BEFORE ASSESSMENT

You will be asked to serve and declare any conflicts with the specific site. A mutually-convenient time will be selected.

When applying to the registry, programs complete a survey that contains many details about the site. The Secretary will send a PDF of those responses will be provided by the Secretary for you review so you have a sense of the program.

Then the results of the pre-assessment of program quality for the site will be shared with you using the below table (see grey shading). The program will have met at least 9 of the 13 standards or 70%. You can review any comments and ask any questions of the Secretary or co-chair.

|  | Quality Standard | Met pre-site visit? | Comments | Met during site visit? | Comments |
| --- | --- | --- | --- | --- | --- |
| 1* | Comprehensive | - yes - no |  | - yes - no |  |
| 2 | Multidisciplinary team | - yes |  | - yes |  |

|  |  | - no |  | - no |  |
| --- | --- | --- | --- | --- | --- |
| 3* | Cardiac emergencies policy | - yes - no |  | - yes - no |  |
| 4 | Assmt tobacco | - yes - no |  | - yes - no |  |
| 5 | Assmt BP | - yes - no |  | - yes - no |  |
| 6* | Program completion rate | - yes - no |  | n/a |  |
| 7 | Peak METs increase | - yes - no |  | n/a |  |
| 8 | QoL increase | - yes - no |  | n/a |  |
| 9 | Mins MVPA ≥150/wk post | - yes - no |  | n/a |  |
| 10 | Knowledge – meds | - yes - no |  | - yes - no |  |
| 11 | Knowledge – lipids | - yes - no |  | - yes - no |  |
| 12 | Knowledge – diet | - yes - no |  | - yes - no |  |
| 13 | Knowledge- return to life roles | - yes - no |  | - yes - no |  |
| Total | 9/13 needed for certification | 70%?   - yes - no |  | 70%?   - yes - no |  |

Programs provide some supporting materials when they apply, as outlined on the website. They are saved on dropbox in the “applicants” folder, in a specific sub-folder for the site (e.g., job descriptions of the team members you will meet). If you do not have access to ICCPR’s Program Certification dropbox and would like to see the materials, the Secretary would be glad to share them with you. Sometimes sites send additional information if we cannot secure a site assessor of the program’s first language so they can be assessed ahead of the site visit and then discussed.

The secretary will have 5 random patient ID#s ready and you can use those during the site visit to pull charts randomly (use as many as needed until you feel confident you can determine whether the quality standard is met or not). The secretary will have access to the demographic information of the patient to confirm it is the right chart.

## POINTS TO REMEMBER

Remember for many attendees on the call, English will not be their first language. So try to speak slowly. Make sure your mouth is visible in the screen. It might be advisable to share the steps of the visit on the screen when they are not sharing something so they can read it too, or even copy / paste into the chat box. You may need to use google translate for key information.

If the site is not ready on time, you cannot view clearly the program, the staff and patients are not available or any of the below 6 elements cannot be demonstrated the site visit should be ceased. The program certification working group will communicate to the site that they may re- attempt on paying the re-attempt fee. Note: a technical rehearsal with the site will be held with the Secretary in advance of the site visit to prevent issues.

During the site visit you are not to convey whether any of the standards are met or not or what the certification decision will be. That must be decided afterward with deliberation.

If you feel you cannot determine from the site visit proceedings whether a standard is met despite probing, you can discuss alternative ways to get the information after the site visit with the secretary (but this should not be communicated during the site visit). Only 9 of 13 need to be met, so it could be that it is not necessary.

The ICRR has separate quality improvement initiatives and they could work with the site separately on those where sites are interested. The purpose here is quality assessment only.

## VIRTUAL SITE ASSESSMENT

Remember your confidentiality declaration and to treat the site with the utmost respect as an ICCPR representative.

Try to have the session flow as per the patient journey. We have also tried to order it by aspect of the site visit (i.e., seeing facilities; talking to staff; talking to patients; checking charts, as per left-hand column in table below).

During the 2-hour visit, you will ask the site to demonstrate the following 6 things (so you can estimate 20 mins each). The site knows to prepare accordingly (if some element cannot be done by the site, you would be informed ahead; for instance patients may not speak in English). You can ask the program probing questions about each.

Start with introductions (assessors and their team). Let them know if you need a better view or to better hear.

Ask them to give an overview of their program and show you around.

| **Assess- ment Aspect** | **Quality Standard/s** | **Evidenced by:** | **Met?** | **Comments** (observations, partially met, unable to determine, probing etc) |
| --- | --- | --- | --- | --- |
| Intro / overview / showing the site overall | - Comprehensive (1) | Show how other components of your CR program are offered (in addition to exercise at least 1 must be offered of the following: patient education [e.g., show materials], risk factor modification [e.g., show charting of cardiac medications], behavior change counselling [e.g., show charting of diet recommendations, tobacco cessation intervention] or stress management / psychosocial [e.g.,  show relaxation techniques recommended to patients]) | - yes - no |  |
| Showing the centre | - Peak METs increase (7) | Show a patient functional capacity test, or if not possible, where / how performed at your program (can be virtual with patient with consent)  *if can speak with patient at this point: Introduce yourself to the patient, and ask them about their journey to CR. Ask them to tell you about their experience in CR thus far. | - yes - no |  |
| Talking to staff | - Multidisciplinary team (2) | Introduce us to 2 members of the team of different disciplines (can include applicant; corresponding to role descriptions provided at time of application), who will describe their clinical roles in the program (if the other person cannot be available, the site visit will need to be  rescheduled upon payment of the re-attempt fee). | - yes - no |  |
| Talking to staff | - Cardiac emergencies policy (3) | Ask the staff to show the policy / procedure binder / manual for handling cardiac emergencies, and summarize to Assessor; Show the means on-site to summon assistance in case of emergency to start life support (latter not applicable to fully remote programs), including equipment for example (e.g, defib machine).  You might want to ask for the records on maintenance of  the crash cart, where applicable. You can ask which staff | - yes - no |  |

|  |  | members have BCLS/ACLS, and one that has the latter you can ask them to show you how the cart is used.  *As a site assessor, you should provide some scenarios and ask how they would deal with that (e.g., hypoglycemia, fall, patient has chest pain) |  |  |
| --- | --- | --- | --- | --- |
| Talking to patients where possible | - Knowledge of meds (10), lipids   (11), diet (12),  return to life roles (13) | Introduce yourself to the patient, and ask them about their journey to CR. Ask them to tell you about their experience in CR thus far. Ask about the education they have received.  Show a patient education session or staff show materials (could be 1-1, virtual and/or group) about each of  medications, lipids, diet, and psychosocial. | - yes - no |  |
| Looking at program records / patient charts | - Comprehensive (1) - Assessment of tobacco (4) - Assessment of BP (5) | Ask staff to show chart of randomly selected patient(s) from registry (site assessor to state registry IDs during site visit, and secretary confirm correct patient chart pulled based on sex, age and initial assessment date with the site), stored securely, documenting:   1. Initial assessment (e.g., history, risk) 2. the risk factors of tobacco use and blood pressure 3. exercise prescription | - yes - no |  |

You should make notes in the right-hand column of the above table during the visit privately.

At the end, thank the site and let them know we will be in contact about the outcome via email in due course.

## AFTER SITE ASSESSMENT

Once you are certain the site has left the meeting, the Secretary will share screen with the applicant assessment form, so you can complete the site visit sections. You can make any comments to describe the site visit and anything that was lacking. Then she will show the first table above and you can discuss whether each of the standards were met during the site visit.

The site assessor may request additional information or documentation be provided after the virtual site visit if meeting of certain quality standards is unclear. During the debriefing conversation, needed information should be specified on the Secretary’s form. In the case where there are some outstanding questions after the visit leading the Assessor(s) to have difficulty in making the certification recommendation, the ICCPR Program Certification committee may be consulted and/or a 2nd evaluation with a different Assessor may be arranged.

Ultimately, carrying forward the decision from registry data for variables that were not assessed during the site visit in the table, it can be determined whether 70% of the standards were met or not (i.e., <9/13=certified site).

You will be asked to give one of the following five recommendations for certification:

1. Yes
2. Perhaps, with some clarification or remediation (would need to be specified; note this decision should be used sparingly)
3. No
4. Could not be determined
5. More information needed prior to decision.

Once any outstanding information is received from the site if applicable, your role is complete. Thank you! The Secretary will communicate the outcome with the Program Certification cttee co-chair, and once confirmed, to the Site.


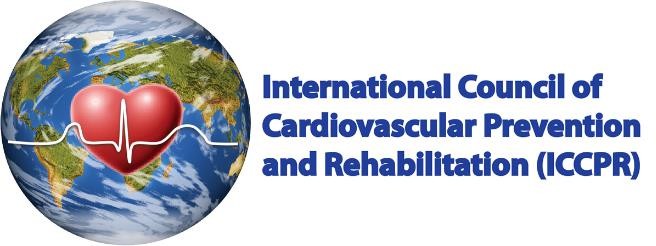


Appendix 6

ICCPR Program Certification

Email Template #2

to applicant programs after site visit (select appropriate template).

## WHERE CERTIFICATION REQUIREMENTS ARE MET

RE: ICCPR Program Certification Application- [COUNTRY] decision Dear Program:

Thank you for your interest in becoming an ICCPR-certified program. We are delighted to inform you that you meet the criteria for certification, and this decision has been finalized by ICCPR’s Program Certification Chair. You can now officially call yourself “ICCPR-Certified!”

Your program is now certified through to December 31, 20xx. The corresponding certificate is attached.

Here is a summary of your program’s performance for each quality standard:

Note ICRR’s user sub-committee may be in touch to invite you to share some of your best practices with other programs, and is available to support you in any way with any areas where you may wish to develop quality further.

The good news will soon be shared on ICCPR’s social media channels (TikTok, Instagram, Twitter, Facebook, LinkedIn) and website. If your staff or institution is on any of these channels, please feel free to provide the handle(s), and we can be sure to tag them. Please also share the posts widely in your circles and platforms.

Please find attached marketing materials you may use to advertise your certification. ICCPR is available to collaborate on any press releases you may wish to pursue.

Certified programs are expected to at least maintain their practices throughout the certification term. ICCPR may conduct periodic audits at any time during the certification period to ensure that the standards are still being met. This may include a site visit or a request for submission of materials related to certification standards.

You are invited to apply for re-certification in advance of the expiry of your term. Full details will be available on our website at [https://globalcardiacrehab.com/Program-Certification.](https://globalcardiacrehab.com/Program-Certification)

| **Item** | **Quality Standard** | **Description** | **Data source** | **Met?** |
| --- | --- | --- | --- | --- |
| *Program-level / Structure & Process Indicators* | | | | |
| 1* | Comprehensive | *Comprehensive program, including (a) initial assessment, (b) structured exercise training (supervised or unsupervised) and  (c) ≥1 other strategy to control CVD risk factors; evidenced based on program survey and during site visit (demonstration of at  least one other component) | Program survey | - yes - no |
| 2 | Multidisciplinary team | Multidisciplinary team (i.e., ≥2 different regulated professions available to support patients at least on a part-time or referral basis) | Program survey, provision of current job descriptions with regulatory body membership  (or equivalent) | - yes - no |
| 3* | Cardiac  emergencies policy | *Cardiac emergency policies in place | Program survey | - yes - no |
| 4 | Assessment of  tobacco | Tobacco use is assessed | Program survey,  responses in ICRR | - yes - no |
| 5 | Assessment of  BP | Blood pressure is assessed | Program survey,  responses in ICRR | - yes - no |
| *Patient-level / Process & Outcome Indicators* | | | | |
| 6 | Program completion rate | Program completion rate: <50% of patients lost to follow-up / dropped out for non-  clinical reasons other than return-to-work | ICRR data | - yes - no |
| 7* | Peak METs  increase | Mean peak METs increase of ≥.5 from pre to  post-program, in program completers | ICRR data | - yes - no |
| 8 | QoL increase | Mean post-program quality of life score >  pre-program score, in program completers | ICRR data | - yes - no |
| 9 | Mins MVPA  ≥150/wk post | Mean minutes of moderate to vigorous- intensity activity per week post-program  /progress ≥150, in program completers | ICRR data | - yes - no |
| 10 | Knowledge – meds | ≥70% of patients reporting yes they know what heart pills they should be taking post- program, in program completers that have  coverage for medication | ICRR data | - yes - no |
| 11 | Knowledge – lipids | ≥70% of patients reporting yes they know their cholesterol level and how to control it  post-program, in program completers | ICRR data | - yes - no |
| 12 | Knowledge – diet | ≥70% of patients reporting yes they know  how to follow a heart-healthy diet post- program, in program completers | ICRR data | - yes - no |

| 13 | Knowledge- return to life roles | ≥70% of patients reporting yes they have been supported to get back to their important life roles post-program, in  program completers | ICRR data | - yes - no |
| --- | --- | --- | --- | --- |
| Total | Total yes: More than 70% (9 standards): □ yes □ no  Mandatory* standards met: □ yes □ no | | | |

Sincerely,

ICCPR Program Certification Secretary

## WHERE CERTIFICATION REQUIREMENTS ARE NOT MET, BUT REMEDIATION COULD RECTIFY

RE: ICCPR Program Certification Application- [COUNTRY] – decision Dear Program:

Thank you for your interest in becoming an ICCPR-certified program.

Following the virtual site visit, please find below a summary of our determination of your quality with regard to each of ICCPR’s standards. Note you can find details regarding how each is operationalized on our website at: [https://globalcardiacrehab.com/Program-Certification.](https://globalcardiacrehab.com/Program-Certification)

| **Item** | **Quality**  **Standard** | **Description** | **Met?** | **Comments (if any)** |
| --- | --- | --- | --- | --- |
| *Program-level / Structure & Process Indicators* | | | | |
| 1* | Comprehensive | *Comprehensive program, including (a) initial assessment, (b) structured exercise training (supervised or unsupervised) and  (c) ≥1 other strategy to control CVD risk factors; evidenced based on program survey and during site visit (demonstration of at  least one other component) | - yes - no |  |
| 2 | Multidisciplinary team | Multidisciplinary team (i.e., ≥2 different regulated professions available to support patients at least on a part-time or referral  basis) | - yes - no |  |
| 3* | Cardiac  emergencies policy | *Cardiac emergency policies in place | - yes - no |  |
| 4 | Assessment of  tobacco | Tobacco use is assessed | - yes - no |  |

| 5 | Assessment of  BP | Blood pressure is assessed | - yes - no |  |
| --- | --- | --- | --- | --- |
| *Patient-level / Process & Outcome Indicators* | | | | |
| 6 | Program completion rate | Program completion rate: <50% of patients lost to follow-up / dropped out for non-  clinical reasons other than return-to-work | - yes - no |  |
| 7* | Peak METs  increase | Mean peak METs increase of ≥.5 from pre to  post-program, in program completers | - yes - no |  |
| 8 | QoL increase | Mean post-program quality of life score >  pre-program score, in program completers | - yes - no |  |
| 9 | Mins MVPA  ≥150/wk post | Mean minutes of moderate to vigorous- intensity activity per week post-program  /progress ≥150, in program completers | - yes - no |  |
| 10 | Knowledge – meds | ≥70% of patients reporting yes they know what heart pills they should be taking post- program, in program completers that have  coverage for medication | - yes - no |  |
| 11 | Knowledge – lipids | ≥70% of patients reporting yes they know their cholesterol level and how to control it  post-program, in program completers | - yes - no |  |
| 12 | Knowledge – diet | ≥70% of patients reporting yes they know  how to follow a heart-healthy diet post- program, in program completers | - yes - no |  |
| 13 | Knowledge- return to life roles | ≥70% of patients reporting yes they have been supported to get back to their important life roles post-program, in  program completers | - yes - no |  |
|  | Total yes: More than 70% (9 standards): □ yes □ no  Mandatory* standards met: □ yes □ no | |  | |

As you will note, unfortunately you have not met the 70% threshold to be considered a certified program at this time.

However, should you perceive there has been any error or oversight, that there is a local context that renders one or more of the indicators inapplicable, or with some remediation some standard(s) could be met, you are welcome to work towards that in conjunction with us, upon payment of the re-attempt fee.

In particular, based on discussions, the following could be pursued to augment your quality, to meet certification standards:

ICCPR remains dedicated to supporting programs to provide high-quality CR to patients in need, and this offer holds for one year. After that period, you are welcome to re-apply at any time.

It has been our pleasure to consider your program and to learn about all it has to offer. Sincerely,

ICCPR Program Certification Secretary

## WHERE CERTIFICATION REQUIREMENTS ARE NOT MET, AND LIKELY NO CHANCE OF REMEDIATION

RE: ICCPR Program Certification Application- [COUNTRY] – decision Dear Program:

Thank you for your interest in becoming an ICCPR-certified program.

Following the virtual site visit, please find below a summary of our determination of your quality with regard to each of ICCPR’s standards. Note you can find details regarding how each is operationalized on our website at: [https://globalcardiacrehab.com/Program-Certification.](https://globalcardiacrehab.com/Program-Certification)

| **Item** | **Quality**  **Standard** | **Description** | **Met?** | **Comments (if any)** |
| --- | --- | --- | --- | --- |
| *Program-level / Structure & Process Indicators* | | | | |
| 1* | Comprehensive | *Comprehensive program, including (a) initial assessment, (b) structured exercise training (supervised or unsupervised) and  (c) ≥1 other strategy to control CVD risk factors; evidenced based on program survey and during site visit (demonstration of at  least one other component) | - yes - no |  |
| 2 | Multidisciplinary team | Multidisciplinary team (i.e., ≥2 different regulated professions available to support  patients at least on a part-time or referral basis) | - yes - no |  |
| 3* | Cardiac emergencies  policy | *Cardiac emergency policies in place | - yes - no |  |
| 4 | Assessment of  tobacco | Tobacco use is assessed | - yes - no |  |
| 5 | Assessment of  BP | Blood pressure is assessed | - yes - no |  |
| *Patient-level / Process & Outcome Indicators* | | | | |
| 6 | Program completion rate | Program completion rate: <50% of patients lost to follow-up / dropped out for non-  clinical reasons other than return-to-work | - yes - no |  |

| 7* | Peak METs  increase | Mean peak METs increase of ≥.5 from pre to  post-program, in program completers | - yes - no |  |
| --- | --- | --- | --- | --- |
| 8 | QoL increase | Mean post-program quality of life score >  pre-program score, in program completers | - yes - no |  |
| 9 | Mins MVPA  ≥150/wk post | Mean minutes of moderate to vigorous- intensity activity per week post-program  /progress ≥150, in program completers | - yes - no |  |
| 10 | Knowledge – meds | ≥70% of patients reporting yes they know what heart pills they should be taking post- program, in program completers that have coverage for medication | - yes - no |  |
| 11 | Knowledge – lipids | ≥70% of patients reporting yes they know their cholesterol level and how to control it  post-program, in program completers | - yes - no |  |
| 12 | Knowledge – diet | ≥70% of patients reporting yes they know  how to follow a heart-healthy diet post- program, in program completers | - yes - no |  |
| 13 | Knowledge- return to life roles | ≥70% of patients reporting yes they have been supported to get back to their important life roles post-program, in  program completers | - yes - no |  |
|  | Total yes:  More than 70% (9 standards): □ yes □ no Mandatory* standards met: □ yes □ no | |  | |

As you will note, unfortunately you have not met the 70% threshold to be considered a certified program at this time.

ICCPR remains dedicated to supporting programs to provide high-quality CR to patients in need. The user sub-committee would be happy to work with you and your program on quality improvement activities should you be interested. Please reply if you would like to take advantage of this. You are welcome to re-apply for certification at a later time once you have had a chance to successfully implement some quality initiatives.

It has been our pleasure to consider your program and to learn about all it has to offer. Sincerely,

ICCPR Program Certification Secretary

RECOGNIZES

[NAME OF PROGRAM]

for delivering high-quality cardiac rehabilitation that exceeds internationally-recognized standards.

Valid from 20xx to December 20xx.

Emma Thomas, PhD


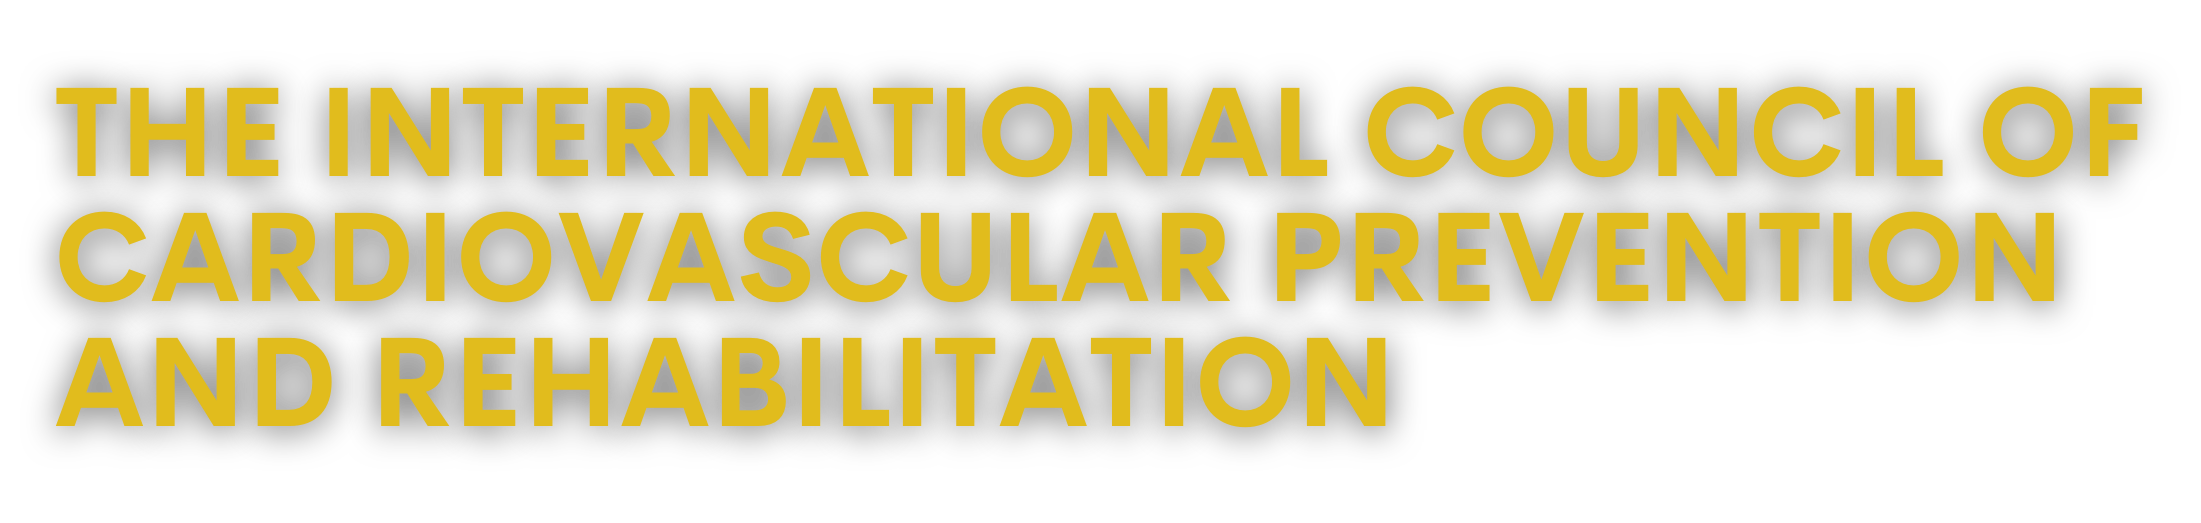

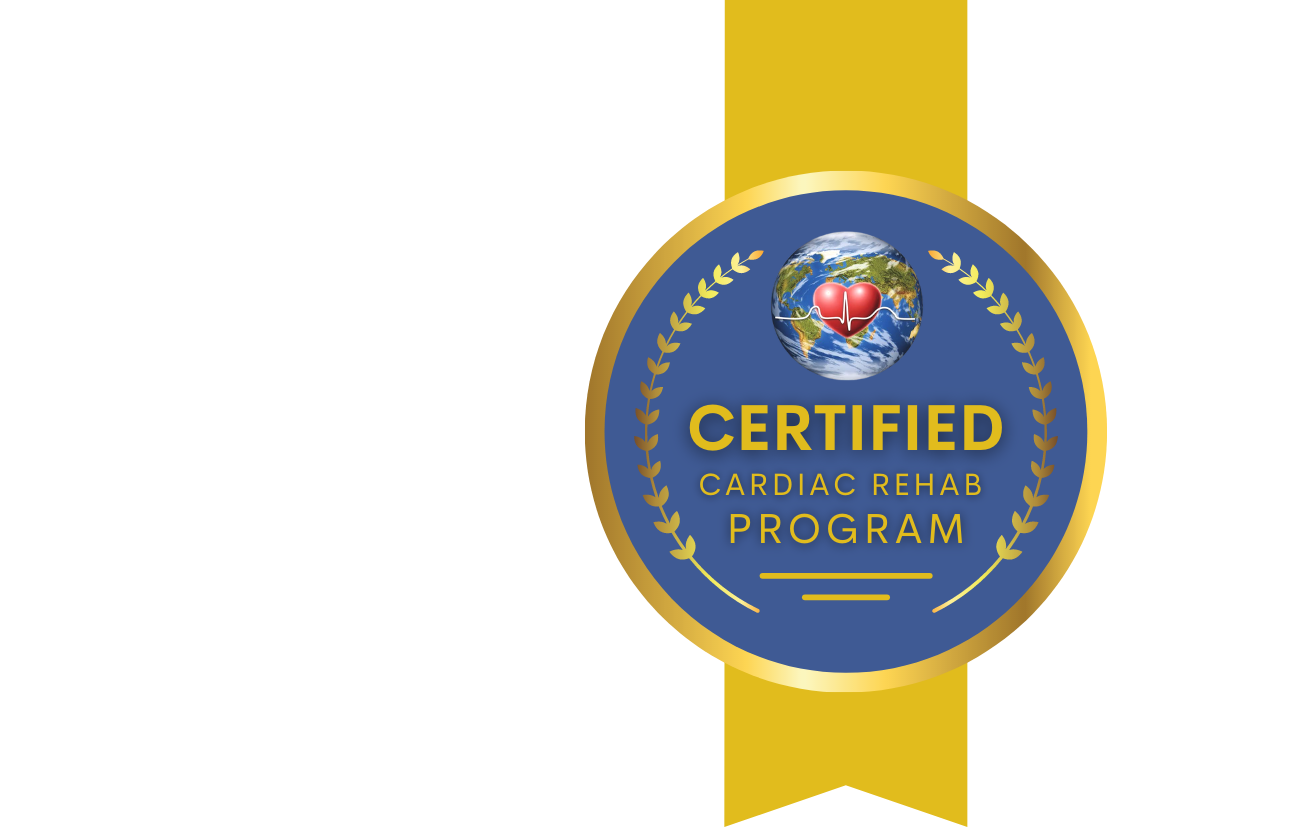


Appendix 7

# ICCPR Program Certification Co-Chair

Sherry Grace, PhD

# ICCPR Executive & Program Certification Chair

### ICCPR Program Certification Pilot

Appendix 8

Semi-structured interview questions for data stewards

Start with welcome, and ask each attendee to state their profession.

Do a reminder around confidentiality, and how we will not reveal their identity in any publications. Any questions about the consent forms?

Reminder that we appreciate their candour in telling us what challenges they had, so we can improve the system for future programs joining ICRR.

PROGRAM CERTIFICATION

1. What would be the motivation for CR programs to be certified?
   1. What were the most important motivations at your centre?
2. ICRR sites are informed about the certification opportunity in an email at 5 months. Do you think this is best? Any ideas on better ways to do that?
3. Comments on webpage
   1. How do you think we could improve the program certification website, to better support interested sites?
4. What do you think about the 13 quality standards themselves?
   1. Did you feel clear about what each quality standard was?
   2. Could you understand how they were assessed?
   3. Did they all seem relevant in your setting?
   4. level of difficulty
      1. Any you think are too difficult to achieve as a low-resource setting?
      2. Any for which you perceive the standard is too low?
      3. Did the cut-offs seem fair and appropriate, given international standards and evidence?
   5. Any you think should be deleted as not important?
   6. Any standards you think are missing? An area of CR we have omitted?
   7. Any other ideas on how they could better be evaluated than as it is set up?
5. Describe your experience communicating with ICCPR about program certification.
   1. The online application (for those that used)
   2. Was the process clear and you knew what to expect?
   3. Did you feel supported through the process? Timely / responsive to your needs?
      1. Where standards were not met, did you feel judgment or support?
   4. What about communication about the initial standard assessment and
      1. certification decision?
         1. Did it feel transparent and clear whether you met each quality standard?
         2. Did the process feel fair, confidential and / or respectful?
6. Describe your experience during the virtual site assessment
   1. Was the process clear and you knew what to expect?
   2. Did you feel supported through the process? Or judged?
   3. Did you perceive the procedures appropriately assessed the standards?

V1; January 16, 2023 p.1

- - 1. In what ways?
  1. How could it have been improved?

1. Upon certification decision
   1. were the marketing materials helpful? Did you use them? Which ones?
      1. Did you print and hang your certificate? Why or why not?
   2. Who did you share them with?
      1. Patients – level of service they can expect
      2. institutional leadership?
      3. Policy-makers / payers?
   3. Were you satisfied with the ways in which ICCPR shared the news of your social media on their website and social media accounts?
   4. What else would you like to support you in sharing the good news of your certification?
2. Were there any effects / impacts from your certification?
   1. Were your motivations to apply fulfilled?
   2. Did you use the results to make any program changes?
3. Do you think there should be a program certification option for programs that are not in the ICRR?
   1. Eg. AACVPR it is optional and EAPC there is no registry (all document uploads)
4. Given the fees,
   1. Do you perceive costs are reasonable?
   2. do you think you will apply for re-certification in 3 years? Why or why not?
5. Thanks for your time. Is there anything else you would like to tell us about your experience learning about and being a part of the registry or getting certified?

V1; January 16, 2023 p.2
